# Supplementary material for: Longitudinal Assessment of Lipoprotein(a) Levels in Perinatally HIV-Infected Children and Adolescents
Source: MDPI journal article supplement (doi:10.3390/v13102067), 2021-10-14
Supplement: s1 [file s1]

# Supplementary Materials

**Table S1.** A. Multivariable analyses in PHIV children and adolescents from first substudy.

|                          | Coefficient | (95%CI)     | p    | Coefficient | (95%CI)     | p    |
|--------------------------|-------------|-------------|------|-------------|-------------|------|
| TC (mmol/l)              | 1.09        | (0.99-1.20) | .077 | 1.06        | (0.93-1.20) | .381 |
| NNRTI use                | 1.06        | (0.98-1.15) | .171 | 1.03        | (0.93-1.14) | .579 |
| BMI (kg/m <sup>2</sup> ) | 0.98        | (0.95-1.00) | .108 | 0.99        | (0.96-1.01) | .277 |
| LDL-C (mmol/l)           | 1.05        | (0.95-1.17) | .348 | 1.09        | (0.95-1.23) | .230 |
| ε2/ε2 haplotype          |             |             |      | 0.18        | (0.04-0.91) | .079 |

Multivariable analyses using mixed models with all significant variables. Results might be biased due to overfitting. Abbreviations: BMI = body mass index; CI = confidence interval; TC = total cholesterol; LDL-C = low-density lipoprotein cholesterol; NNRTI = Non-Nucleoside Reverse-Transcriptase Inhibitor.
